# Supplementary material for: Accumulation-based Runoff and Pluvial Flood Estimation Tool
Source: Copernicus journal article supplement (doi:10.5194/egusphere-2025-4447), 2025-10-09
Supplement: Supplementary file 1 [file egusphere-2025-4447-supplement.pdf]

# Accumulation-based Runoff and Pluvial Flood Estimation Tool

## Supplementary Material

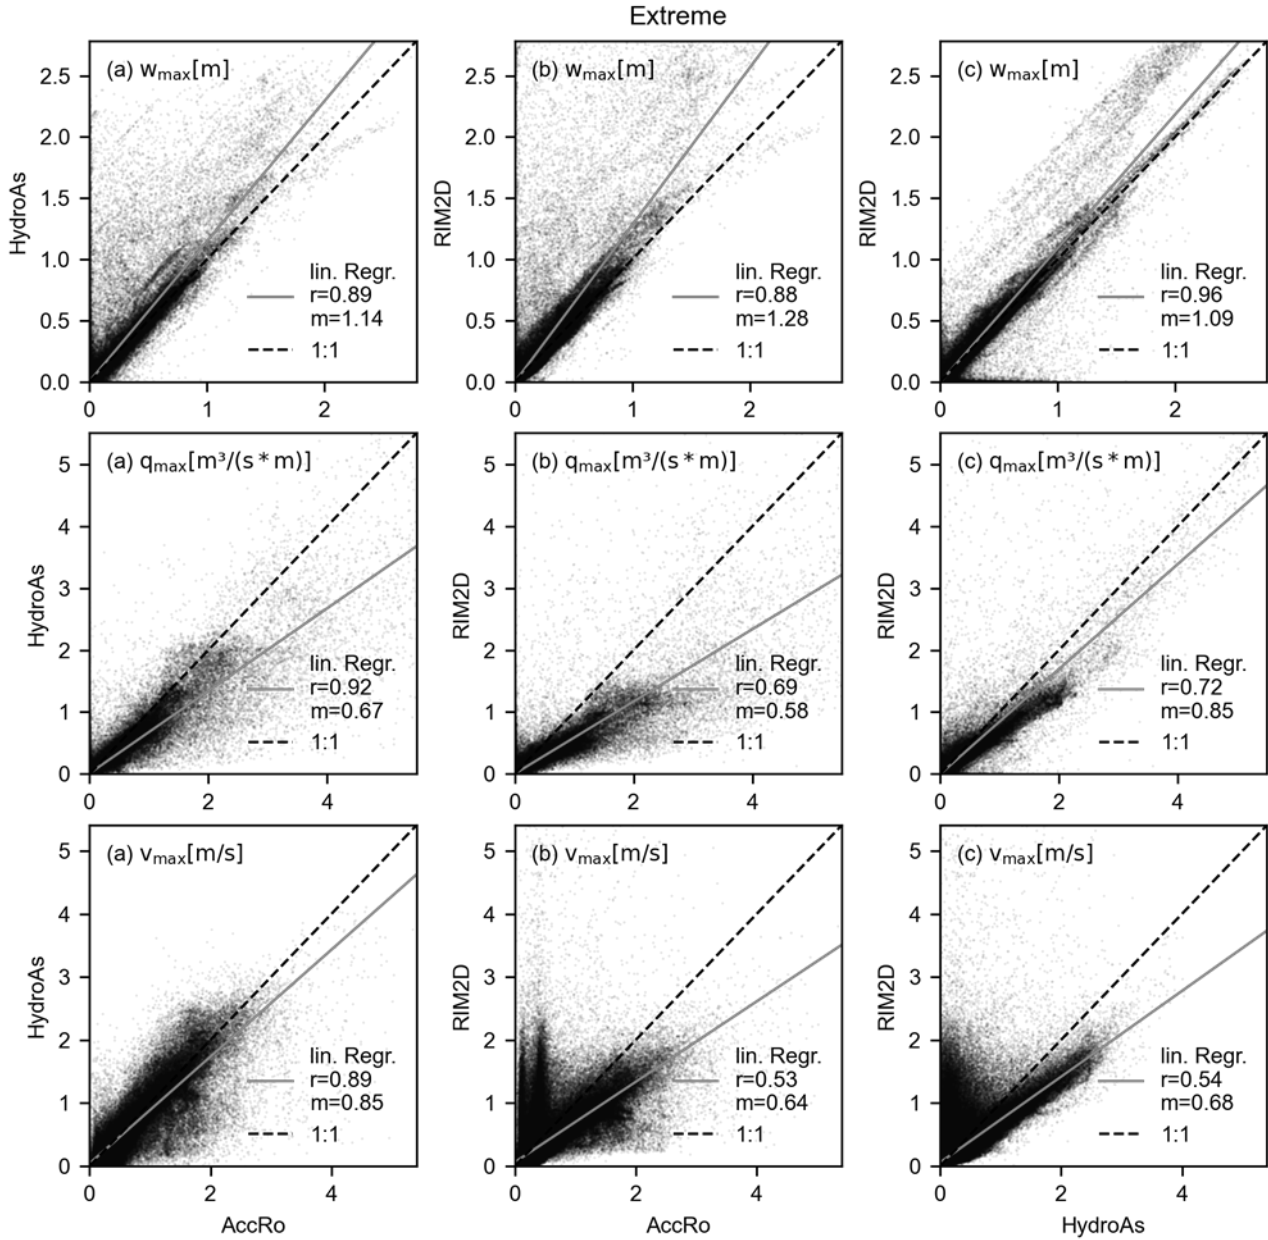

**Figure S1: Scatterplot of the three models for the extreme scenario. First row  $w_{max}$  (m), second row  $q_{max}$  ( $m^3/(m \cdot s)$ ) and third row  $v_{max}$  (m/s) for the extreme event. In addition, the linear regression (grey) and 1:1 line (dashed black) as well as the slope of the linear regression ( $m$ ) and the Pearson correlation coefficient ( $r$ ) are shown.**

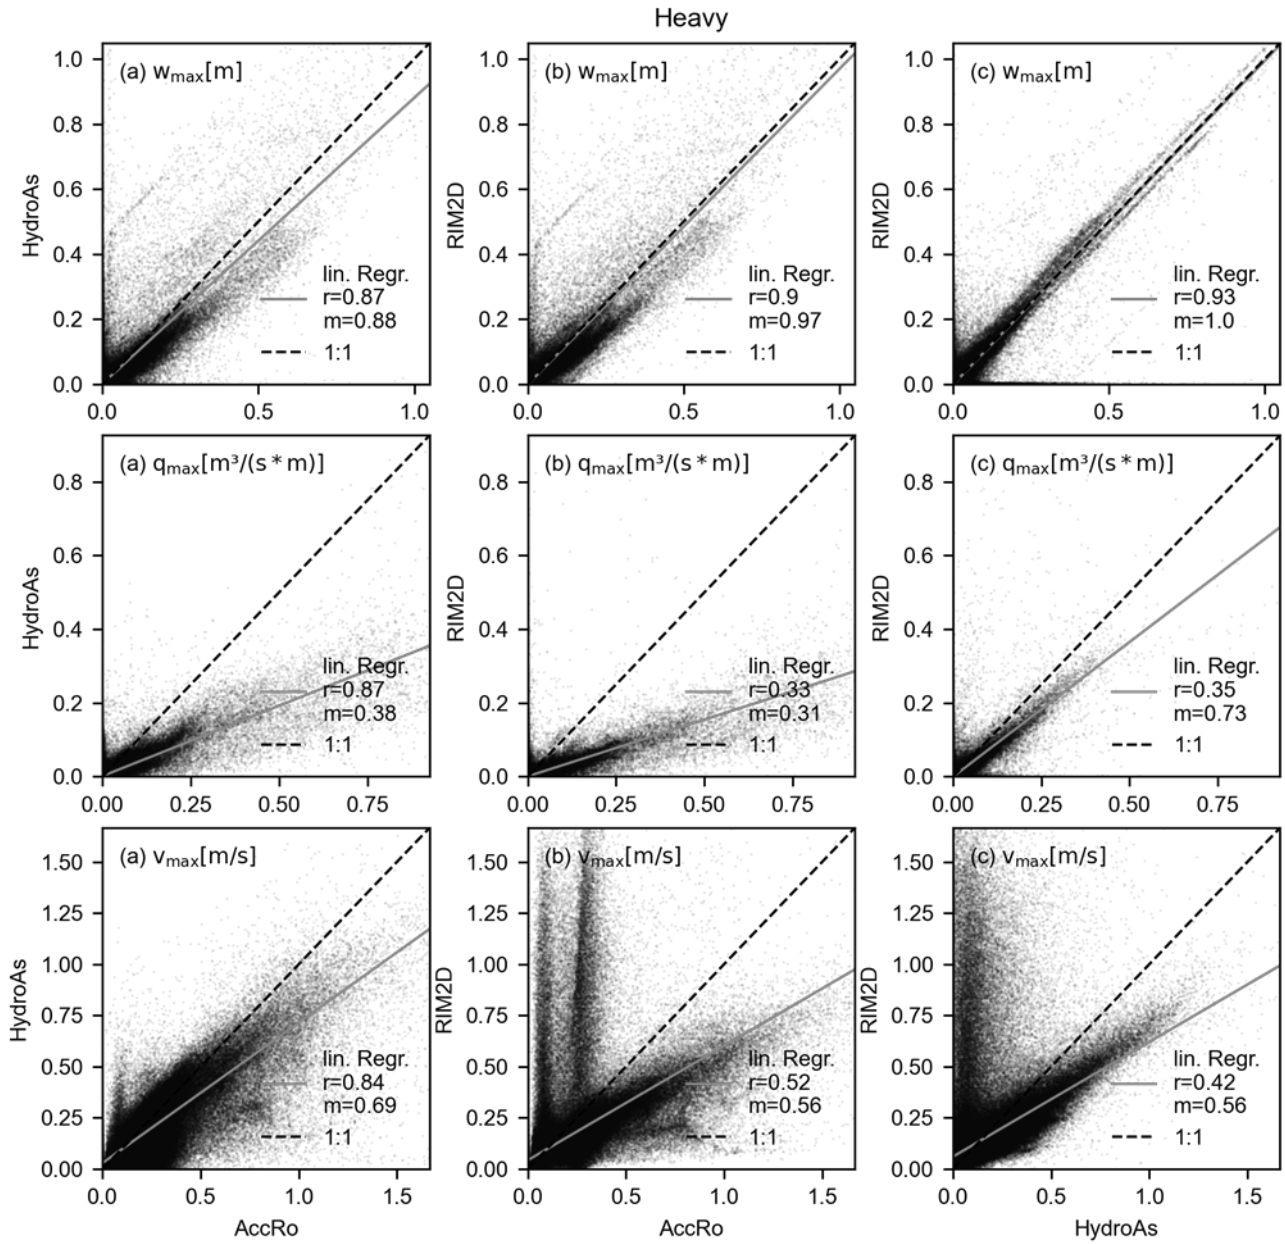

Figure S2: Scatterplot of the three models for the heavy scenario. First row  $w_{max}$  (m), second row  $q_{max}$  ( $m^3/(m \cdot s)$ ) and third row  $v_{max}$  (m/s) for the heavy event. In addition, the linear regression (grey) and 1:1 line (dashed black) as well as the slope of the linear regression (m) and the Pearson correlation coefficient (r) are shown.

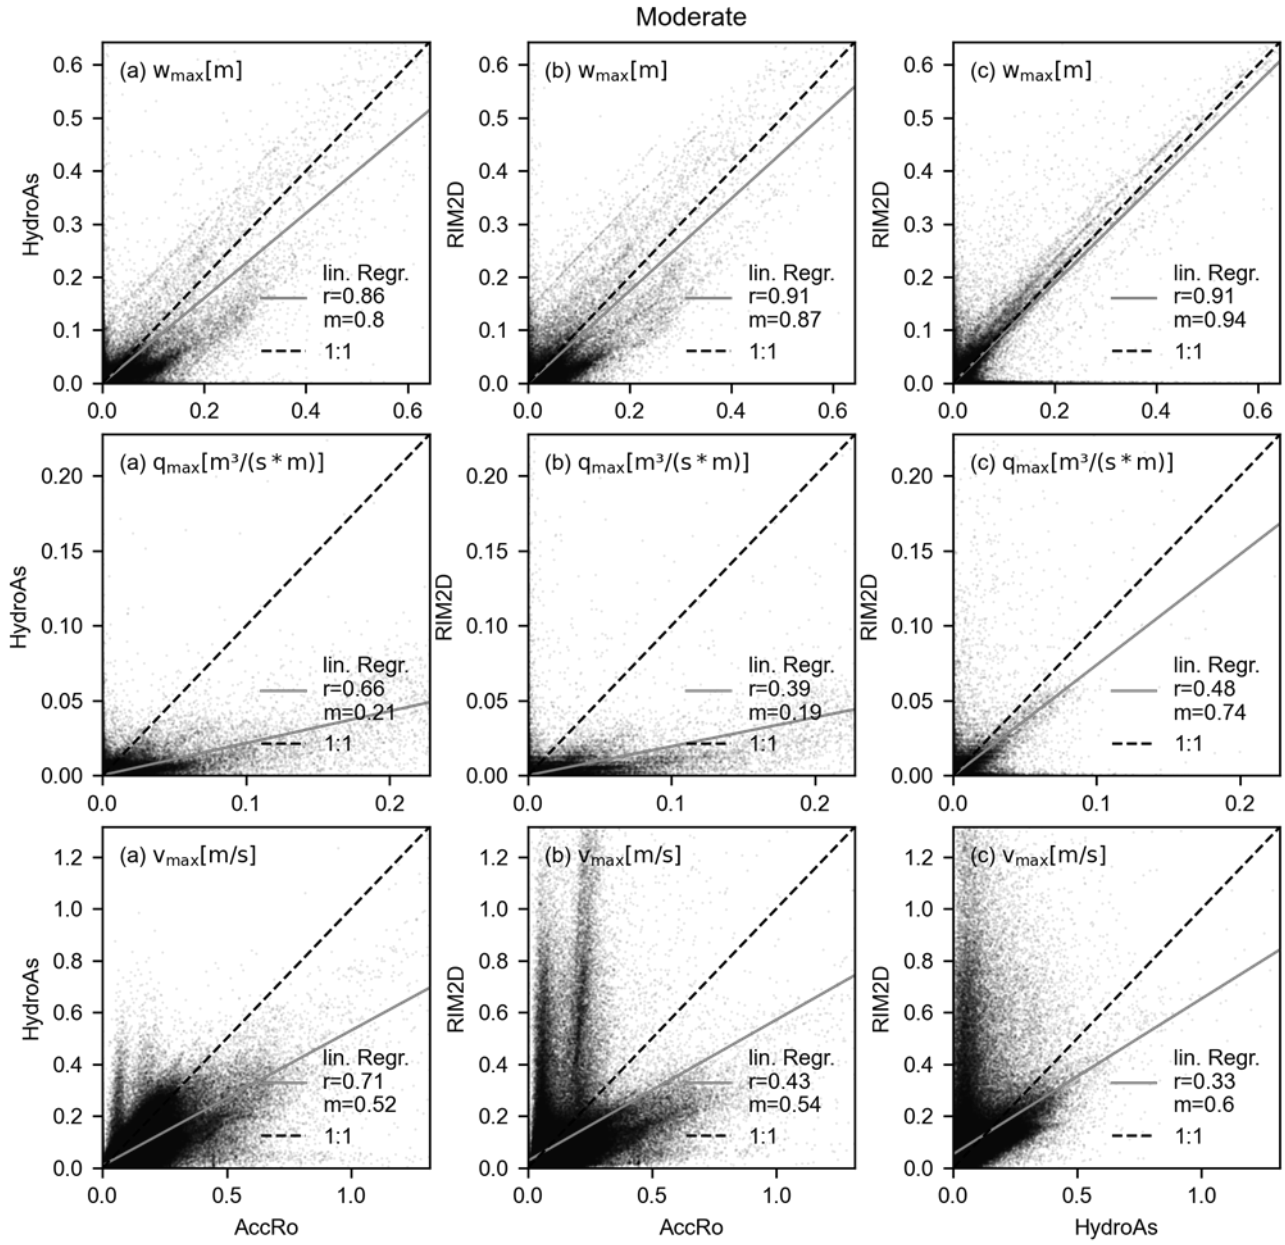

Figure S3: Scatterplot of the three models for the moderate scenario. First row  $w_{max}$  (m), second row  $q_{max}$  ( $m^3/(m \cdot s)$ ) and third row  $v_{max}$  (m/s) for the moderate event. In addition, the linear regression (grey) and 1:1 line (dashed black) as well as the slope of the linear regression (m) and the Pearson correlation coefficient (r) are shown.
